# Supplementary material for: Glypican-3 induces oncogenicity by preventing IGF-1R degradation, a process that can be blocked by Grb10
Source: PubMed Central journal article supplement (PMC5655209; doi:10.18632/oncotarget.19035), 2017-07-06
Supplement: oncotarget-08-80429-s001.pdf [file oncotarget-08-80429-s001.pdf]

# Glypican-3 induces oncogenicity by preventing IGF-1R degradation, a process that can be blocked by Grb10

## Supplementary Materials

### HepG2

Purchased from ATCC (HB-8065) in 2003  
 Reauthentication Oct 16, 2013 by STR DNA Profiling Analysis  
 Results: Similar to previous prescription

CID20130134  
Human Cell Line DNA Typing Report

## Cell Line DNA Typing Report

Case Number: CID20130134  
Report Date: 10/18/2013

**Mission Biotech**  
 10F-3, No.3, Yuanchi Street  
 Nangang, Taipei  
 Taiwan 115  
 Tel: 886 2 26557128  
 Email: service@missionbio.com.tw

---

**Sample Information:**

- i. Applicant Name: 潘弘偉
- ii. Institution: 高雄榮民總醫院教學研究部
- iii. Sample Description: HepG2
- iv. Sample type: Cell Pellet
- v. Sample Received Date: 10/09/2013

---

**Allele table for the tested cell DNA**

| STR Locus  | Repeat Numbers |
|------------|----------------|
| D5S818     | 11,13          |
| D13S317    | 9,13           |
| D7S820     | 10             |
| D16S539    | 12,13          |
| vWA        | 17             |
| TH01       | 9              |
| Amelogenin | X,Y            |
| TPOX       | 8,9            |
| CSF1PO     | 10,11          |
| D21S11     | 29,31          |

**Test Description:**

CaseNumber: CID20130134  
Test Date: 10/16/2013

Sample was extracted by Roche MagNA Pure Compact System.  
 DNA conc.= 123.3 ng/μl  
 OD260/280 = 2.08  
 OD260/230 = 2.19

This test was performed by using the PromegaGenePrint® 10 System and analyzed by ABI PRISM 3730 GENETIC ANALYZER and GeneMapper® Software V3.7.

Verified by:  
Laboratory Director(Title)

*Zhang Kuei Chang*  
\_\_\_\_\_  
10/18/2013

## HuH-7

Purchased from JCRB (JCRB0403) in 2005  
Reauthentication Oct 15, 2013 by STR DNA Profiling Analysis  
Results: Similar to previous prescription

Human Cell Line DNA Typing Report

# Cell Line DNA Typing Report

Case Number: CID20130125  
Report Date: 10/15/2013

## Mission Biotech

10F-3, No.3, Yuanchi Street  
Nangang, Taipei  
Taiwan 115  
Tel: 886 2 26557128  
Email: service@missionbio.com.tw

### Sample Information:

- i. Applicant Name: 鄭威 Cheng Wei
- ii. Institution: 衛生福利部基隆醫院  
Kee-Lung Hospital, Ministry of Health and Welfare
- iii. Sample Description: Huh7
- iv. Sample type: Cell Pellet
- v. Sample Received Date: 10/03/2013

### Allele table for the tested cell DNA

| STR Locus  | Repeat Numbers |
|------------|----------------|
| D5S818     | 11,12          |
| D13S317    | 9,10,11,13     |
| D7S820     | 10,11          |
| D16S539    | 10,12,13       |
| vWA        | 16,17,18       |
| TH01       | 7,9            |
| Amelogenin | X,Y            |
| TPOX       | 8,9,11         |
| CSF1PO     | 10,11          |
| D21S11     | 29,30,31       |

### Test Description:

Case Number: CID20130125  
Test Date: 10/09/2013

Sample was extracted by Roche  
MagNA Pure Compact System.  
DNA conc. = 208.6 ng/ $\mu$ l  
OD260/280 = 2.01  
OD260/230 = 2.30

This test was performed by using the  
Promega GenePrint<sup>®</sup> 10 System and  
analyzed by ABI PRISM 3730 GENETIC  
ANALYZER and GeneMapper<sup>®</sup> Software  
V3.7.

Verified by:  
Laboratory Director (Title)

Liang Kwei Chang

10/15/2013

## PLC-PRF-5

Purchased from ATCC (CRL-8024) in 2003  
Reauthentication Oct 15, 2013 by STR DNA Profiling Analysis  
Results: Similar to previous prescription

Human Cell Line DNA Typing Report

# Cell Line DNA Typing Report

## Mission Biotech

10F-3, No.3, Yuanchi Street  
Nangang, Taipei  
Taiwan 115  
Tel: 886 2 26557128  
Email: service@missionbio.com.tw

Case Number: CID20130124

Report Date: 10/15/2013

### Sample Information:

- i. Applicant Name: 鄭威 Cheng Wei
- ii. Institution: 衛生福利部基隆醫院  
Kee-Lung Hospital, Ministry of Health and Welfare
- iii. Sample Description: PLC
- iv. Sample type: Cell Pellet
- v. Sample Received Date: 10/03/2013

### Allele table for the tested cell DNA

| STR Locus  | Repeat Numbers |
|------------|----------------|
| D5S818     | 12,13          |
| D13S317    | 8,11,12        |
| D7S820     | 9,10,12        |
| D16S539    | 12,13          |
| vWA        | 16,18,19       |
| TH01       | 7,8,9.3        |
| Amelogenin | X,Y            |
| TPOX       | 8,11           |
| CSF1PO     | 10,11,12       |
| D21S11     | 29,30,32.2     |

### Test Description:

Case Number: CID20130124

Test Date: 10/09/2013

Sample was extracted by Roche  
MagNA Pure Compact System.

DNA conc. = 126.8 ng/ $\mu$ l

OD260/280 = 2.00

OD260/230 = 2.25

This test was performed by using the  
Promega GenePrint® 10 System and  
analyzed by ABI PRISM 3730 GENETIC  
ANALYZER and GeneMapper® Software  
V3.7.

Verified by:

Laboratory Director (Title)

Liang Kuei Chang

10/15/2013

## HEK293T

Purchased from ATCC (CRL-3216) in 2003  
Reauthentication Jan 14, 2014 by STR DNA Profiling Analysis  
Results: Similar to previous prescription

### **MB** MISSION BIOTECH

明欣生物科技有限公司  
台北市南港區園區街3號10樓之1  
Tel: 02-26557128  
Email: genomics@missionbio.com.tw  
<http://www.missionbio.com.tw>

## Cell Line DNA Typing Report

| Customer Details |                    |                        |                    |
|------------------|--------------------|------------------------|--------------------|
| Contact Name     | 鄭威                 | Principal Investigator | 鄭威                 |
| Department       | 衛生福利部基隆醫<br>院解剖病理科 | Phone                  | (02)247292525-5213 |

| Sample Details |      |                 |            |
|----------------|------|-----------------|------------|
| Sample Name    | 293T | Sample Received | 01/13/2014 |
| Sample Type    | Cell | Sample Analyzed | 01/24/2014 |

| Report                 |                                                                                                                                                                                                                                                                                                                                                                                                                                                                                                                              |                |                |        |              |      |        |      |        |     |            |            |      |        |        |         |           |        |        |         |            |        |      |
|------------------------|------------------------------------------------------------------------------------------------------------------------------------------------------------------------------------------------------------------------------------------------------------------------------------------------------------------------------------------------------------------------------------------------------------------------------------------------------------------------------------------------------------------------------|----------------|----------------|--------|--------------|------|--------|------|--------|-----|------------|------------|------|--------|--------|---------|-----------|--------|--------|---------|------------|--------|------|
| Genomic DNA Extraction | <input type="checkbox"/> No<br><input checked="" type="checkbox"/> Yes. Genomic DNA was extracted by Roche MagNA Pure Compact System and quantified by Nanodrop.                                                                                                                                                                                                                                                                                                                                                             |                |                |        |              |      |        |      |        |     |            |            |      |        |        |         |           |        |        |         |            |        |      |
| Analysis Reagent       | GenePrint® 10 System                                                                                                                                                                                                                                                                                                                                                                                                                                                                                                         |                |                |        |              |      |        |      |        |     |            |            |      |        |        |         |           |        |        |         |            |        |      |
| Analysis Platform      | ABI PRISM 3730 Genetic Analyzer and GeneMapper® Software V3.7                                                                                                                                                                                                                                                                                                                                                                                                                                                                |                |                |        |              |      |        |      |        |     |            |            |      |        |        |         |           |        |        |         |            |        |      |
| Analysis Result        | <table border="1"><thead><tr><th>STR Locus</th><th>Repeat Numbers</th></tr></thead><tbody><tr><td>D21S11</td><td>28, 29, 30.2</td></tr><tr><td>TH01</td><td>7, 9.3</td></tr><tr><td>TPOX</td><td>12, 12</td></tr><tr><td>vWA</td><td>17, 19, 20</td></tr><tr><td>Amelogenin</td><td>X, X</td></tr><tr><td>CSF1PO</td><td>11, 12</td></tr><tr><td>D16S539</td><td>9, 10, 14</td></tr><tr><td>D7S820</td><td>10, 11</td></tr><tr><td>D13S317</td><td>11, 12, 14</td></tr><tr><td>D5S818</td><td>8, 9</td></tr></tbody></table> | STR Locus      | Repeat Numbers | D21S11 | 28, 29, 30.2 | TH01 | 7, 9.3 | TPOX | 12, 12 | vWA | 17, 19, 20 | Amelogenin | X, X | CSF1PO | 11, 12 | D16S539 | 9, 10, 14 | D7S820 | 10, 11 | D13S317 | 11, 12, 14 | D5S818 | 8, 9 |
|                        | STR Locus                                                                                                                                                                                                                                                                                                                                                                                                                                                                                                                    | Repeat Numbers |                |        |              |      |        |      |        |     |            |            |      |        |        |         |           |        |        |         |            |        |      |
|                        | D21S11                                                                                                                                                                                                                                                                                                                                                                                                                                                                                                                       | 28, 29, 30.2   |                |        |              |      |        |      |        |     |            |            |      |        |        |         |           |        |        |         |            |        |      |
|                        | TH01                                                                                                                                                                                                                                                                                                                                                                                                                                                                                                                         | 7, 9.3         |                |        |              |      |        |      |        |     |            |            |      |        |        |         |           |        |        |         |            |        |      |
|                        | TPOX                                                                                                                                                                                                                                                                                                                                                                                                                                                                                                                         | 12, 12         |                |        |              |      |        |      |        |     |            |            |      |        |        |         |           |        |        |         |            |        |      |
|                        | vWA                                                                                                                                                                                                                                                                                                                                                                                                                                                                                                                          | 17, 19, 20     |                |        |              |      |        |      |        |     |            |            |      |        |        |         |           |        |        |         |            |        |      |
|                        | Amelogenin                                                                                                                                                                                                                                                                                                                                                                                                                                                                                                                   | X, X           |                |        |              |      |        |      |        |     |            |            |      |        |        |         |           |        |        |         |            |        |      |
|                        | CSF1PO                                                                                                                                                                                                                                                                                                                                                                                                                                                                                                                       | 11, 12         |                |        |              |      |        |      |        |     |            |            |      |        |        |         |           |        |        |         |            |        |      |
|                        | D16S539                                                                                                                                                                                                                                                                                                                                                                                                                                                                                                                      | 9, 10, 14      |                |        |              |      |        |      |        |     |            |            |      |        |        |         |           |        |        |         |            |        |      |
|                        | D7S820                                                                                                                                                                                                                                                                                                                                                                                                                                                                                                                       | 10, 11         |                |        |              |      |        |      |        |     |            |            |      |        |        |         |           |        |        |         |            |        |      |
| D13S317                | 11, 12, 14                                                                                                                                                                                                                                                                                                                                                                                                                                                                                                                   |                |                |        |              |      |        |      |        |     |            |            |      |        |        |         |           |        |        |         |            |        |      |
| D5S818                 | 8, 9                                                                                                                                                                                                                                                                                                                                                                                                                                                                                                                         |                |                |        |              |      |        |      |        |     |            |            |      |        |        |         |           |        |        |         |            |        |      |
